# Supplementary material for: Animal Model Dependent Response to Pentagalloyl Glucose in Murine Abdominal Aortic Injury
Source: J Clin Med. 2021 Jan 9;10(2):219. doi: 10.3390/jcm10020219 (PMC7827576; doi:10.3390/jcm10020219)
Supplement: Supplementary file 1 [file jcm-10-00219-s001.zip]

Archive with 4 entries (4 files):
- Supplemental_FigureS1_Final.tif
- Supplemental_Video1.mp4
- Supplementary section_Proofed.docx
- Supplementary section_Proofed.pdf
